1 **Autoantibodies against nephrin elucidate a novel autoimmune phenomenon in proteinuric**  
2 **kidney disease**

3

4 **Authors**

5 Andrew J.B. Watts<sup>1,2\*</sup>, Keith H. Keller<sup>1\*</sup>, Gabriel Lerner<sup>3,4</sup>, Ivy Rosales<sup>5</sup>, A. Bernard Collins<sup>5</sup>,  
6 Miroslav Sekulic<sup>1,6</sup>, Sushrut S. Waikar<sup>2,4</sup>, Anil Chandraker<sup>2</sup>, Leonardo V. Riella<sup>2</sup>, Mariam P.  
7 Alexander<sup>7</sup>, Jonathan P. Troost<sup>8</sup>, Junbo Chen<sup>3</sup>, Damian Fermin<sup>9</sup>, Jennifer Lai Yee<sup>9</sup>, Matthew  
8 Sampson<sup>10,11</sup>, Laurence H. Beck, Jr.<sup>4</sup>, Joel M. Henderson<sup>3</sup>, Anna Greka<sup>2,11</sup>, Helmut G. Rennke<sup>1</sup>,  
9 and Astrid Weins<sup>1,2,†</sup>

10

11 <sup>1</sup>Department of Pathology, Brigham and Women's Hospital, and Harvard Medical School,  
12 Boston, MA

13 <sup>2</sup>Renal Division, Department of Medicine, Brigham and Women's Hospital, and Harvard  
14 Medical School, Boston, MA

15 <sup>3</sup>Department of Pathology, Boston Medical Center and Boston University, Boston, MA

16 <sup>4</sup>Section of Nephrology, Department of Medicine, Boston Medical Center and Boston  
17 University, Boston, MA

18 <sup>5</sup>Department of Pathology, Massachusetts General Hospital, and Harvard Medical School,  
19 Boston, MA

20 <sup>6</sup>Department of Pathology and Cell Biology, Columbia University College of Physicians and  
21 Surgeons

22 <sup>7</sup>Department of Laboratory Medicine and Pathology, Mayo Clinic, Rochester, MN

23 <sup>8</sup>Division of Nephrology, Department of Pediatrics, University of Michigan, Ann Arbor, MI

24 <sup>9</sup>Division of Medicine, Department of Pediatrics, University of Michigan School of Medicine,  
25 Ann Arbor, MI

26 <sup>10</sup>Department of Medicine/Pediatric Nephrology, Boston Children's Hospital, and Harvard  
27 Medical School, Boston, MA

28 <sup>11</sup>Broad Institute of MIT and Harvard, Cambridge, MA

29

30 \*These authors contributed equally to this study.

31

32 †Corresponding author:

33

34 Astrid Weins, M.D., Ph.D.

35 Associate Pathologist, Department of Pathology, Brigham and Women's Hospital

36 Assistant Professor of Pathology, Harvard Medical School,

37 Cotran-3, Room AL380.B

38 75 Francis Street

39 Boston, MA 02115

40 Phone: 617-732-7671

41 [aweins@bwh.harvard.edu](mailto:aweins@bwh.harvard.edu)

42

43

44

45

46

47

48

49 **Abstract**

50 Dysfunction of podocytes, cells critical for glomerular filtration, underlies proteinuria and kidney  
51 failure. Genetic forms of proteinuric kidney disease can be caused by mutations in several  
52 podocyte genes, including nephrin, a critical component of the kidney filter. In contrast, the  
53 etiology of acquired acute-onset nephrotic syndrome has remained elusive. Here we identify  
54 autoantibodies against nephrin in serum and glomeruli of a subset of adults and children with  
55 non-congenital acute nephrotic syndrome. Our findings align with published experimental  
56 animal studies and elucidate a novel autoimmune phenomenon in proteinuric kidney disease  
57 interfering with glomerular filter integrity.

58

59 **Introduction**

60 Diffuse podocytopathy with minimal changes (Minimal Change Nephrotic Syndrome, MCNS) is  
61 an important and common pathologic diagnosis in adults and children with nephrotic syndrome  
62 (NS). It is characterized by minimal changes by light microscopy, but extensive injury to  
63 glomerular podocytes with diffuse foot process effacement (FPE) and loss of slit diaphragms  
64 (SD) by electron microscopy (EM) in the absence of electron dense deposits<sup>1</sup>. The consequence  
65 of these alterations is massive proteinuria secondary to failure of the glomerular filtration barrier  
66 (GFB), whose integrity is critically dependent on the specialized junctional SD protein complex  
67 linking the interdigitating podocyte foot processes.

68

69 Nephrin is an essential component of the SD<sup>2,3</sup>, as illustrated by genetic mutations in nephrin,  
70 that cause complete lack of cell surface localization, underlying Congenital Nephrotic Syndrome  
71 of the Finnish Type (CNF)<sup>4,5</sup>. In contrast to congenital NS with an established genetic basis, the  
72 cause of non-congenital NS in both children and adults remains largely unknown. There is strong  
73 evidence supporting immune dysregulation with a potential causative circulating factor, however  
74 its identity has remained elusive<sup>6,7</sup>. Glucocorticoids are effective at inducing remission, however  
75 relapse, steroid dependence and intolerance are common, often requiring alternative  
76 immunosuppressive agents<sup>8</sup>. In those patients with steroid dependent NS who progress to end  
77 stage kidney disease (ESKD) and require kidney transplantation, the disease can promptly recur  
78 in the allograft<sup>1</sup>.

79

80 The recent discovery that anti-CD20 B-cell targeted therapies are effective in children with  
81 frequently relapsing or steroid-dependent NS<sup>9-11</sup> and in adults<sup>12</sup> suggests a potential  
82 autoantibody-mediated etiology. However, this possibility is hard to reconcile with the  
83 traditional view of MCNS lacking IgG deposition on renal biopsy<sup>13</sup>. Whilst diffuse podocyte-  
84 associated IgG is described in MCD, it is minimal compared to that seen in membranous  
85 nephropathy (MN), and in the absence of deposits by EM is generally attributed to non-specific  
86 protein resorption of little significance<sup>14</sup>.

87

88 Antibodies targeting this essential SD component nephrin have been shown to cause massive  
89 proteinuria when administered in animal models<sup>15-17</sup> and when they arise as alloantibodies  
90 following kidney transplantation in children with CNF and complete nephrin deficiency<sup>18</sup>. In  
91 both animal models<sup>15,16</sup> and cultured podocytes<sup>7,19</sup>, anti-nephin antibodies cause a redistribution

92 of nephrin that is identical to that observed in renal biopsies of patients with NS<sup>20,21</sup>. This  
93 redistribution of nephrin away from the SD has been proposed as a mechanism to explain the  
94 proteinuria in these patients; however, the cause of this redistribution remains unknown.

95  
96 Differing from classic immune complex deposition diseases such as membranous nephropathy,  
97 the phenomenon of functional autoantibody-mediated disruption of a junctional adhesion  
98 complex is well described for the blistering skin condition pemphigus<sup>22</sup>. In this disease,  
99 autoantibodies directly bind desmogleins (dsg), a critical constituent of the desmosomal cell  
100 adhesion complex, analogous to nephrin in the SD complex, and cause redistribution of dsg away  
101 from the cell surface with consequent loss of desmosomal integrity and ultimately cell-cell  
102 interactions<sup>22</sup>.

103  
104 Taken together these observations led us to hypothesize that autoantibodies against nephrin may  
105 underlie non-congenital MCNS by affecting the integrity of the SD complex.

106  
107 **Results**

108 To first determine whether circulating autoantibodies against nephrin are detectable in the serum  
109 of patients with biopsy proven MCD and no known genetic basis (lacking known pathogenic  
110 variants in established Mendelian NS genes), we evaluated serum obtained from the Nephrotic  
111 Syndrome Study Network (NEPTUNE) longitudinal cohort study<sup>23</sup> consisting of 41 (66%)  
112 children and 21 (34%) adults (Table S1). We developed an indirect enzyme-linked  
113 immunosorbent assay (ELISA) using a recombinant, affinity purified extracellular domain of  
114 human nephrin (hNephrin<sub>G1059</sub>) (Fig. S1) and established a threshold for anti-nephrin antibody

115 (ab) positivity, based on the maximum titer in a healthy control population (n=30) (Fig. 1a).  
116 Evaluation of the earliest serum sample obtained during active disease (urine protein to  
117 creatinine ratio, UPCR > 3g/g) revealed that 18 (29%) of 62 patients, with an equal number of  
118 adults and children, were positive for autoantibodies against nephrin (Fig. 1a). Control sera from  
119 53 (98%) of 54 patients who tested positive for anti-hPLA<sub>2</sub>R antibodies, by clinically validated  
120 ELISA and indirect immunofluorescence test (IIFT) assays, were negative for anti-nephrin ab  
121 (Fig. 1a).

122  
123 The patients' clinical characteristics (Table S2) and the median time from enrollment to  
124 complete remission (CR) were similar between the anti-nephrin ab positive and negative groups  
125 (4.4 months vs 5.4 months respectively; p=0.7288) (Fig. S2). However, the relapse-free period  
126 was shorter for the anti-nephrin ab positive group compared with the ab negative group, although  
127 this finding did not reach conventional levels of statistical significance (median time to relapse  
128 6.0 months vs 21.57 months respectively; p=0.0945) (Fig. S2).

129  
130 A subsequent serum sample was available during either complete (UPCR < 0.3 g/g) or partial  
131 remission (>50% reduction in proteinuria) from 12 of the 18 anti-nephrin ab positive patients, in  
132 whom we observed a complete absence or a significant reduction of nephrin autoantibodies  
133 respectively (Fig. 1b, Figs. S3, S4). In keeping with the ELISA results, only serum obtained  
134 during active disease or partial remission immunoprecipitated nephrin from healthy donor kidney  
135 derived human glomerular extract (HGE), whereas serum obtained during complete remission  
136 did not (Fig. 1c).

137

138 To further investigate a potential pathogenic role of these nephrin autoantibodies, we next sought  
139 to establish whether they are present within kidneys of patients with MCD. One limitation of the  
140 NEPTUNE cohort is that biopsy material from these patients was not available for further  
141 evaluation and so we turned to our own institution and collaborators for biopsy and serum  
142 samples.

143 For many years, we have observed a delicate punctate staining for IgG in a subset of patients  
144 with MCD (MCD+) by routine immunofluorescence staining that is distinct from the background  
145 (Fig. S5a). It is much more subtle when compared to the prominent IgG staining observed in MN  
146 (Fig. S5a), and while this feature has been previously described<sup>14</sup>, its significance has not been  
147 fully established. We therefore hypothesized that this subtle IgG may represent autoantibodies  
148 targeting nephrin. To limit the possibility of staining artifacts, we routinely use a directly  
149 conjugated FITC anti-human IgG F(ab)<sub>2</sub> ab which we have independently validated with a distinct  
150 unconjugated anti-human IgG ab, an anti-light chain ab and isotype specific anti-IgG abs that all  
151 show an identical staining pattern (Fig. S6). Importantly, we observe a complete lack of  
152 concurrent glomerular albumin staining, indicating that this feature is IgG selective and does not  
153 reflect non-specific protein resorption (Fig. S6).

154  
155 We utilized confocal microscopy to further evaluate this punctate IgG in renal biopsies that were  
156 received and processed by us over the last 3 years. We observed two predominant patterns of  
157 IgG distribution: GBM-associated fine punctate or curvilinear structures and more apically  
158 located punctate and vaguely vesicular clusters. These disparate staining patterns may reflect  
159 different stages of antibody binding and/or redistribution. In all the MCD+ biopsies evaluated,  
160 we observed specific co-localization of nephrin with the punctate IgG and not the background

161 (Fig 2a, Fig. S5b, Fig. S7) which was further corroborated in the control biopsies lacking this  
162 punctate IgG (Fig. 2a, Fig. S5b). Antigen specificity was evidenced by a clear spatial association  
163 of the IgG with the SD-associated nephrin but not with the podocyte foot process associated  
164 synaptopodin by confocal microscopy (Fig. 2a,b, Fig. S5c) and by Super-Resolution Structured  
165 Illumination Microscopy (SR-SIM) which achieves an even higher spatial resolution<sup>24</sup> (Fig. 2c,d,  
166 Fig. S8). Furthermore, in those biopsies exhibiting the granular redistribution of nephrin away  
167 from the SD, as previously described in MCD<sup>20,21</sup>, the IgG did not co-localize with the three  
168 intracellular podocyte specific proteins; synaptopodin (foot process associated), podocin (SD  
169 associated) and WT1 (nuclear) (Fig. S9).

170  
171 To confirm that MCD+ patients with punctate IgG on renal biopsy do indeed have circulating  
172 autoantibodies against nephrin, we evaluated serum or plasma that was available specifically  
173 during active disease for 9 of them. As expected, all 9 patients were serologically positive for  
174 anti-nephrin antibodies by ELISA, in contrast to 12 control patients lacking punctate IgG on  
175 renal biopsy, who were all serologically negative (Fig. 2e, Table S3). A follow-up serum or  
176 plasma sample was available for 4 of the 9 MCD+ patients, which showed a significant reduction  
177 in antibody titer concordant with treatment response (Fig. 2f, Fig. S10). These findings were  
178 corroborated by IP (Fig. S11), and for all the patients in this study who were serologically  
179 positive for circulating nephrin autoantibodies they did not cross react with PLA<sub>2</sub>R (Fig. S12).

180  
181 Finally, to highlight a potential role of pre-transplant nephrin autoantibodies in post-transplant  
182 disease recurrence, which generally shows morphologic features indistinguishable from MCNS,  
183 we identified a patient with childhood onset, steroid dependent MCNS and no underlying genetic



184 basis (as determined by clinical whole exome sequencing) who progressed to ESKD requiring  
185 kidney transplantation. In keeping with a pathogenic role for anti-nephrin autoantibodies, the  
186 patient developed massive proteinuria early post-transplant, that in contrast to CNF<sup>18,19</sup> was  
187 associated with high pre-transplant levels of nephrin autoantibodies (Fig. S13).

188

## 189 **Discussion**

190 Herein, we describe the discovery of circulating autoantibodies against the extracellular domain  
191 of nephrin, the essential constituent of the podocyte SD, in a subset of patients with non-  
192 congenital acute nephrotic syndrome. These nephrin autoantibodies are specifically present in  
193 MCNS kidney biopsies, forming distinct clusters. Our observations share striking parallels with  
194 the autoimmune blistering skin condition pemphigus, in which circulating autoantibodies target  
195 the desmosomal cell adhesion molecules desmogleins (dsg)<sup>22</sup>. In pemphigus, these  
196 autoantibodies directly interfere with cell adhesion through redistribution, clustering and  
197 endocytosis of dsg that disrupts the integrity of the desmosome<sup>22</sup>. Previous reports of  
198 experimental anti-nephrin antibody mediated disruption of nephrin homophilic interactions  
199 further support this potential mechanism in MCNS<sup>3</sup>. Furthermore, pemphigus exhibits a rapid  
200 response to glucocorticoid treatment (within days to weeks) that cannot be explained by reduced  
201 IgG synthesis alone and may be due to compensatory desmoglein synthesis in keratinocytes<sup>25</sup>.  
202 Similarly, most cases of MCNS respond rapidly to glucocorticoids (within weeks) which have  
203 also been shown to upregulate nephrin cell surface expression in cultured human podocytes<sup>26</sup>.  
204 Based on these findings, we speculate that the IgG co-localizing with nephrin in MCNS kidney  
205 biopsies may represent *in situ* binding of nephrin autoantibodies. This binding may trigger the  
206 redistribution of nephrin and result in SD failure with acute onset, massive proteinuria.

207

208 Recurrent acute nephrotic syndrome in the allograft, referred to as “recurrent FSGS” (rFSGS) in  
209 patients with a history of acute nephrotic syndrome in the native kidney, is morphologically  
210 indistinguishable from MCNS. Therefore, we also included a study in a transplant patient with an  
211 initial diagnosis of MCD in the native kidney which then progressed to FSGS and eventually  
212 ESKD. This patient rapidly developed acute and high proteinuria post-transplant consistent with  
213 rFSGS, which was not confirmed by a biopsy; however, the pre-transplant serum showed high  
214 levels of anti-nephrin antibodies which decreased after aggressive and successful treatment with  
215 rituximab and plasmapheresis; this patient went into sustained remission and retained the  
216 transplant. We realize that without further corroboration in a larger rFSGS patient sample, no  
217 definitive conclusions can be drawn. However, this case illustrates the need to advocate for a  
218 comprehensive analysis of anti-nephrin antibodies also in this group of patients with a much  
219 more devastating prognosis.

220

221 In conclusion, our discovery adds new insights into the etiology of a disease that has been poorly  
222 understood for decades. Future studies will be needed to establish the prevalence of this new  
223 subset of anti-nephrin antibody positive NS and the prognostic benefit of anti-nephrin antibodies  
224 as a novel, minimally invasive biomarker. Nevertheless, our work provides a mechanistic  
225 rationale for consideration of B-cell targeted therapy in a subset of NS patients and allows us to  
226 molecularly define those patients who stand to benefit most from the development of new,  
227 targeted therapeutic strategies for anti-nephrin antibody positive NS.

228

229

230 **Methods**

231 **Clinical samples (Kidney tissue and serum/plasma)**

232 Renal biopsies were independently assessed by collaborating renal pathologists across four  
233 institutions: Brigham and Women's Hospital (BWH), Massachusetts General Hospital (MGH),  
234 Boston Medical Center (BMC) and the Mayo Clinic. Serum/plasma was obtained from patients  
235 attending those institutions as either discarded samples originally collected for clinical analysis  
236 (BWH/BMC/Mayo clinic) or archival samples from the Kidney Disease Biobank (courtesy of  
237 Dr. Sushrut Waikar, Partners Healthcare, in accordance with Partners Healthcare IRB Approval  
238 for patients attending BWH or MGH and were consented for serum/plasma collection at the time  
239 of renal biopsy). Histological studies were performed on archival kidney tissue that was received  
240 for routine clinical evaluation and included diffuse podocytopathies, other nephrotic conditions,  
241 and non-neoplastic renal parenchyma from tumor nephrectomies. Medical record review,  
242 histological and serological studies were approved by the respective Institutional Review Boards  
243 (IRB) for those institutions. Similarly, sera were obtained from patients with biopsy proven  
244 minimal change disease (MCD) from the Nephrotic Syndrome Study Network (NEPTUNE)  
245 longitudinal study<sup>23</sup> during active disease and where available, in remission. Healthy control  
246 sera were randomly selected from Partners Healthcare Biobank, specifically excluding those  
247 subjects with any renal or autoimmune disease. Sera from nephrotic patients were evaluated for  
248 anti-hPLA<sub>2</sub>R antibodies at the MGH Immunopathology laboratory using a commercial enzyme  
249 linked immunosorbent assay (ELISA) and indirect immunofluorescence test (IIFT)  
250 (Euroimmun). Samples were coded to preserve patient anonymity.

251

252

253 **Whole genome sequencing of the NEPTUNE cohort**

254 Whole genome sequencing with a goal median depth of 30x was performed using Illumina Hi-  
255 seq. A standard pipeline, Gotcloud, was applied for sequence alignment and variant calling<sup>27,28</sup>.  
256 The variant analysis focused on approximately 70 genes implicated in Mendelian NS. To screen  
257 pathogenic variants in the 70 previously implicated Mendelian NS genes, we employed a  
258 pipeline similar to one that has been previously reported<sup>29</sup>. The pathogenicity variants were  
259 ultimately classified according to ACMG standards and guidelines<sup>30</sup>.

260

261 **Human glomerular extract**

262 Human glomerular extract (HGE) was prepared as previously described by Beck *et al*<sup>31</sup>. Briefly,  
263 glomeruli were isolated from human kidneys deemed non-suitable for transplantation (that had  
264 been authorized for use in medical research) obtained from New England Donor Services, by  
265 graded sieving followed by isolation of glomerular proteins in RIPA buffer (Boston  
266 BioProducts). IgG was pre-cleared from tissue lysate by incubation with Protein G Plus agarose  
267 beads (Santa Cruz). Only kidneys with less than 20% global glomerulosclerosis, on routine  
268 wedge biopsy, were used for glomerular isolation.

269

270 **Routine renal biopsy processing**

271 After biopsy acquisition, renal cortex was immediately allocated for light (10% neutral-buffered  
272 formalin), immunofluorescence (Zeus transport media) and electron microscopy (Karnovsky's  
273 fixative) processing. For routine clinical immunofluorescence, 4 µm cryosections were fixed in  
274 95% ethanol for 10 minutes and incubated with FITC-conjugated polyclonal rabbit F(ab)<sub>2</sub> anti-  
275 human IgG antibody (Dako; F0315) diluted 1:20. FITC-conjugated sheep anti-human IgG1,

276 IgG2, IgG3, IgG4 (Binding Site; AF006, AF007, AF008, AF009, respectively) diluted 1:20 were  
277 used for IgG subclass evaluation. Albumin was detected using FITC-conjugated polyclonal  
278 rabbit anti-human albumin (Dako; F0117) diluted 1:30. Sections were mounted using Dako  
279 fluorescence mounting medium (Dako; S3023) with a #1.5 coverslip. Immunofluorescence  
280 images were acquired on an Olympus BX53 microscope with an Olympus DP72 camera at 150  
281 ms exposure.

282

### 283 **Confocal microscopy**

284 For confocal microscopy, 4  $\mu\text{m}$  cryosections of human kidney biopsies were fixed in 95%  
285 ethanol for 10 minutes and subsequently blocked for one hour at room temperature (RT) with  
286 phosphate buffer saline (PBS) supplemented with 0.2% fish gelatin, 2% bovine serum albumin  
287 (BSA) and 2% fetal bovine serum (FBS). All antibodies were diluted in this blocking solution  
288 and incubated for one hour at RT. Nephtrin was detected using 1  $\mu\text{g}/\text{ml}$  primary polyclonal sheep  
289 anti-human nephtrin (R&D systems; AF4269) followed by a secondary AlexaFluor<sup>TM</sup> 568-  
290 conjugated donkey anti-sheep IgG (Invitrogen; A21099). Synaptopodin was detected using anti-  
291 synaptopodin (N-terminus) guinea pig polyclonal antiserum (Progen; GP94-N) diluted 1:1000  
292 followed by a secondary AlexaFluor<sup>TM</sup> 568-conjugated goat anti-guinea pig IgG (Invitrogen;  
293 A11075) antibody. Podocin and Wilms Tumor 1 (WT1) were detected using a primary  
294 polyclonal rabbit anti-human podocin (Millipore Sigma; P0372) and a primary monoclonal  
295 rabbit anti-human WT1 clone SC06-41 (Invitrogen; MA5-32215) diluted 1:500 and 1:300  
296 respectively, followed by a secondary AlexaFluor<sup>TM</sup> 568-conjugated donkey anti-rabbit IgG  
297 (Invitrogen; A10042). IgG immune deposits were detected using a primary monoclonal mouse  
298 anti-human IgG antibody (Abcam; ab200699) diluted 1:750 followed by a secondary

299 AlexaFluor<sup>TM</sup> 488-conjugated donkey anti-mouse IgG (Invitrogen; A21202). All secondary  
300 AlexaFluor<sup>TM</sup>-conjugated antibodies were diluted 1:500. Sections were mounted using  
301 Vectashield anti-fade mounting medium (Vectashield, H-1000) with a #1.5 coverslip and images  
302 were acquired on a Leica TCS SPE microscope.

303

### 304 **Structured Illumination Microscopy (SIM)**

305 Structured Illumination Microscopy (SIM) imaging was performed on 4  $\mu\text{m}$  fixed, frozen human  
306 kidney biopsy sections processed according to the aforementioned protocol for confocal  
307 microscopy. All images were collected using an OMX V4 Blaze (GE Healthcare) microscope  
308 equipped with three watercooled PCO.edge sCMOS cameras, 488 nm, 568 nm laser lines, and  
309 528/48 nm, 609/37 nm emission filters (Omega Optical). Images were acquired with a 60X/1.42  
310 Plan-Apochromat objective lens (Olympus) with a final pixel size of 80 nm. Z stacks of 4-8  $\mu\text{m}$ ,  
311 were acquired with a 0.125  $\mu\text{m}$  z-spacing, and 15 raw images (three rotations with five phases  
312 each) were acquired per plane. Spherical aberration was minimized for each sample using  
313 immersion oil matching<sup>24</sup>. Super resolution images were computationally reconstructed from the  
314 raw data sets with a channel-specific, measured optical transfer function, and a Wiener filter  
315 constant of 0.001 using CUDA-accelerated 3D-SIM reconstruction code<sup>32</sup>. Axial and lateral  
316 chromatic misregistration was determined using a single biological calculation slide, prepared  
317 with human kidney tissue stained with a primary mouse anti-human IgG monoclonal antibody  
318 (Abcam; ab200699) followed by both secondary AlexaFluor<sup>TM</sup> 488-conjugated donkey anti-  
319 mouse IgG (Invitrogen; A21202) and AlexaFluor<sup>TM</sup> 568-conjugated goat anti-mouse IgG  
320 (Invitrogen; A11031) antibodies on the same tissue cryosection. Experimental data sets were  
321 then registered using the imwarp function in MATLAB (MathWorks)<sup>33</sup>.

322

323

324 **Generation of recombinant human nephrin and phospholipase A<sub>2</sub> receptor (PLA<sub>2</sub>R)**

325 Separate plasmids encoding the extracellular subdomains of human nephrin (amino acids 1-  
326 1059), comprising the 8 Ig-like C2-type domains and a single fibronectin type III domain, and  
327 human phospholipase A<sub>2</sub> receptor (hPLA<sub>2</sub>R), comprising the N-terminal ricin domain,  
328 fibronectin type II domain and 8 C-type lectin domains (CTLD), both with C-terminal  
329 polyhistidine (6XHIS) tags, were generated by standard cloning techniques. The correct  
330 sequences were confirmed by whole plasmid sequencing (MGH DNA core). HEK293-F cells  
331 (Thermo Fisher) were transfected with 0.5 µg plasmid per 10<sup>6</sup> cells using 1.5 µg PEI  
332 (polyethylenimine). The plasmid and PEI were pre-incubated for 20 mins in Freestyle media  
333 (Thermo Fisher) at one tenth the final volume and then added dropwise to the cells. After 3-5  
334 days, provided the cell viability was >95%, the cell culture media was harvested by  
335 centrifugation (300 xg for 10 mins). Imidazole was added to a final concentration of 10 mM and  
336 the media was filter sterilized (0.2 µm) on ice. Nickel NTA resin (Qiagen) was washed 3x with  
337 10 mM Imidazole in PBS and then incubated with the filtered media overnight at 4°C on a roller  
338 mixer (Thermo Fisher). The Nickel NTA resin was then washed 3x with 10 mM Imidazole in  
339 PBS and the recombinant proteins were eluted with 300 mM Imidazole in PBS. The purity of the  
340 eluted fractions was confirmed by SDS-PAGE with a 4-12% Bis-Tris gel (Invitrogen), pooled  
341 together and concentrated to 1 ml using an Amnicon centrifugation filter with a 10K molecular  
342 weight cut off (Millipore). The resultant protein was run over a Sephadex<sup>TM</sup> 300 column and 0.5  
343 ml fractions were collected. The purity of the eluted fractions was confirmed by SDS-PAGE on a  
344 4-12% Bis-Tris gel (Invitrogen) and the concentration determined by measuring absorbance at

345 280 nm using a Nanodrop spectrophotometer (Thermo Fisher). Immunoreactivity of the purified  
346 nephrin was confirmed by Western blot analysis, under reducing conditions using a primary  
347 sheep anti-human nephrin antibody (R&D) followed by a secondary HRP-conjugated donkey  
348 anti-sheep IgG antibody (Jackson immunoresearch), and of the purified hPLA<sub>2</sub>R under non-  
349 reducing conditions using serum from a patient with known anti-PLA<sub>2</sub>R antibodies (determined  
350 by commercial ELISA and IIFT (Euroimmun)) diluted 1:1000 and a secondary HRP-conjugated  
351 donkey anti-human IgG antibody (Jackson Immunoresearch).

352

### 353 **Enzyme Linked Immunosorbent Assay (ELISA)**

354 Please contact the corresponding author for information.

355

### 356 **Immunoprecipitation and Western Blot**

357 Please contact the corresponding author for information.

358

### 359 **Acknowledgements**

360 We acknowledge Lin Shao (Yale University) for CUDA-accelerated 3D-SIM reconstruction  
361 code, and Talley Lambert, Anna Payne-Jost and Jennifer Waters (Nikon Imaging Core, Harvard  
362 Medical School) for assistance with SIM acquisition. We are grateful to Dr. Opeyemi Olabisi for  
363 ApoL1 genotyping, and Drs. Emily Dulude, Durga Rao and Andrew Bentall for providing  
364 supporting clinical data. We are thankful to Dr. Colin Garvie and Dr. Kasia Handing for  
365 assistance with protein purification. We thank Terri Woo, Colleen Ford, Kristie Swett, Hui Chen  
366 and Brant Douglas for expert technical assistance, and Dr. Andrew Lichtman, Dr. David Salant,  
367 Dr. Moran Dvela, Dr. Juanchi Pablo, Dr. Silvana Bazua Valenti, Dr. Katherine Vernon, Dr.



368 Valeria Padovano and Morgan Thompson for enlightening discussions. We thank Dr. Camden  
369 Bay from Harvard Catalyst for biostatistics consultation. A.J.B.W. was supported by T32  
370 training fellowships T32HL007627 and T32DK007527. A.W. was supported by an Eleanor  
371 Miles Shore Fellowship by Harvard Medical School and is a current recipient of a  
372 NephCure/NEPTUNE ancillary study award. G.L. is supported by NIH grant DK007053-45S1.  
373 A.G. is supported by NIH grants DK099465 and DK095045. S.W. is supported by NIH grants  
374 U01DK085660, U01DK104308, and UG3DK114915. M.S. is supported by NIH grant  
375 R01DK119380 and R01DK1088085. A.G. has financial interest in Goldfinch Biopharma, which  
376 was reviewed and is managed by Brigham and Women’s Hospital, Mass General Brigham, the  
377 Broad Institute and Harvard University in accordance with their conflict of interest policies.  
378 A.J.B.W., K.H.K., A.W., J.M.H and H.G.R. have filed a provisional patent “Methods for  
379 identifying and treating patients with antibody-mediated acquired primary or recurrent idiopathic  
380 nephrotic syndrome”. The Nephrotic Syndrome Study Network Consortium (NEPTUNE), U54-  
381 DK-083912, is a part of the National Institutes of Health (NIH) Rare Disease Clinical Research  
382 Network (RDCRN), supported through a collaboration between the Office of Rare Diseases  
383 Research (ORDR), NCATS, and the National Institute of Diabetes, Digestive, and Kidney  
384 Diseases. Additional funding and/or programmatic support for this project has also been  
385 provided by the University of Michigan, the NephCure Kidney International and the Halpin  
386 Foundation.  
387

## 388 References

- 389 1. Vivarelli, M., Massella, L., Ruggiero, B. & Emma, F. Minimal Change Disease. *Clin J*  
390 *Am Soc Nephrol* **12**, 332-345 (2017).
- 391 2. Grahammer, F., Schell, C. & Huber, T.B. The podocyte slit diaphragm--from a thin grey  
392 line to a complex signalling hub. *Nat Rev Nephrol* **9**, 587-598 (2013).
- 393 3. Khoshnoodi, J., *et al.* Nephrin promotes cell-cell adhesion through homophilic  
394 interactions. *Am J Pathol* **163**, 2337-2346 (2003).
- 395 4. Kestila, M., *et al.* Positionally cloned gene for a novel glomerular protein--nephrin--is  
396 mutated in congenital nephrotic syndrome. *Mol Cell* **1**, 575-582 (1998).
- 397 5. Liu, L., *et al.* Defective nephrin trafficking caused by missense mutations in the NPHS1  
398 gene: insight into the mechanisms of congenital nephrotic syndrome. *Hum Mol Genet* **10**,  
399 2637-2644 (2001).
- 400 6. Elie, V., Fakhoury, M., Deschenes, G. & Jacqz-Aigrain, E. Physiopathology of idiopathic  
401 nephrotic syndrome: lessons from glucocorticoids and epigenetic perspectives. *Pediatr*  
402 *Nephrol* **27**, 1249-1256 (2012).
- 403 7. Coward, R.J., *et al.* Nephrotic plasma alters slit diaphragm-dependent signaling and  
404 translocates nephrin, Podocin, and CD2 associated protein in cultured human podocytes.  
405 *J Am Soc Nephrol* **16**, 629-637 (2005).
- 406 8. Ravani, P., Bertelli, E., Gill, S. & Ghiggeri, G.M. Clinical trials in minimal change  
407 disease. *Nephrol Dial Transplant* **32**, i7-i13 (2017).
- 408 9. Ravani, P., Bonanni, A., Rossi, R., Caridi, G. & Ghiggeri, G.M. Anti-CD20 Antibodies  
409 for Idiopathic Nephrotic Syndrome in Children. *Clin J Am Soc Nephrol* **11**, 710-720  
410 (2016).
- 411 10. Basu, B., *et al.* Efficacy of Rituximab vs Tacrolimus in Pediatric Corticosteroid-  
412 Dependent Nephrotic Syndrome: A Randomized Clinical Trial. *JAMA Pediatr* **172**, 757-  
413 764 (2018).
- 414 11. Basu, B. Ofatumumab for rituximab-resistant nephrotic syndrome. *N Engl J Med* **370**,  
415 1268-1270 (2014).
- 416 12. Fenoglio, R., *et al.* Rituximab as a front-line therapy for adult-onset minimal change  
417 disease with nephrotic syndrome. *Oncotarget* **9**, 28799-28804 (2018).
- 418 13. Madanchi, N., Bitzan, M. & Takano, T. Rituximab in Minimal Change Disease:  
419 Mechanisms of Action and Hypotheses for Future Studies. *Can J Kidney Health Dis* **4**,  
420 2054358117698667 (2017).
- 421 14. D'Agati, V.D. Minimal Change Disease. in *Atlas of Nontumor Pathology. Non-neoplastic*  
422 *Kidney Kidney Diseases.*, Vol. Fascicle 4 109 (American Registry of Pathology,  
423 Washington, DC, 2005).
- 424 15. Oriksa, M., Matsui, K., Oite, T. & Shimizu, F. Massive proteinuria induced in rats by a  
425 single intravenous injection of a monoclonal antibody. *J Immunol* **141**, 807-814 (1988).
- 426 16. Topham, P.S., *et al.* Nephritogenic mAb 5-1-6 is directed at the extracellular domain of  
427 rat nephrin. *J Clin Invest* **104**, 1559-1566 (1999).
- 428 17. Takeuchi, K., *et al.* New Anti-Nephrin Antibody Mediated Podocyte Injury Model Using  
429 a C57BL/6 Mouse Strain. *Nephron* **138**, 71-87 (2018).
- 430 18. Holmberg, C. & Jalanko, H. Congenital nephrotic syndrome and recurrence of  
431 proteinuria after renal transplantation. *Pediatr Nephrol* **29**, 2309-2317 (2014).

- 432 19. Kuusniemi, A.M., *et al.* Plasma exchange and retransplantation in recurrent nephrosis of  
433 patients with congenital nephrotic syndrome of the Finnish type (NPHS1).  
434 *Transplantation* **83**, 1316-1323 (2007).
- 435 20. Doublier, S., *et al.* Nephtrin redistribution on podocytes is a potential mechanism for  
436 proteinuria in patients with primary acquired nephrotic syndrome. *Am J Pathol* **158**,  
437 1723-1731 (2001).
- 438 21. Wernerson, A., *et al.* Altered ultrastructural distribution of nephtrin in minimal change  
439 nephrotic syndrome. *Nephrol Dial Transplant* **18**, 70-76 (2003).
- 440 22. Hammers, C.M. & Stanley, J.R. Mechanisms of Disease: Pemphigus and Bullous  
441 Pemphigoid. *Annu Rev Pathol* **11**, 175-197 (2016).
- 442 23. Gadegbeku, C.A., *et al.* Design of the Nephrotic Syndrome Study Network (NEPTUNE)  
443 to evaluate primary glomerular nephropathy by a multidisciplinary approach. *Kidney Int*  
444 **83**, 749-756 (2013).
- 445 24. Gustafsson, M.G. Surpassing the lateral resolution limit by a factor of two using  
446 structured illumination microscopy. *J Microsc* **198**, 82-87 (2000).
- 447 25. Nguyen, V.T., *et al.* Pemphigus vulgaris IgG and methylprednisolone exhibit reciprocal  
448 effects on keratinocytes. *J Biol Chem* **279**, 2135-2146 (2004).
- 449 26. Xing, C.Y., *et al.* Direct effects of dexamethasone on human podocytes. *Kidney Int* **70**,  
450 1038-1045 (2006).
- 451 27. Jun, G., Wing, M.K., Abecasis, G.R. & Kang, H.M. An efficient and scalable analysis  
452 framework for variant extraction and refinement from population-scale DNA sequence  
453 data. *Genome Res* **25**, 918-925 (2015).
- 454 28. Gillies, C.E., *et al.* An eQTL Landscape of Kidney Tissue in Human Nephrotic  
455 Syndrome. *Am J Hum Genet* **103**, 232-244 (2018).
- 456 29. Sampson, M.G., *et al.* Using Population Genetics to Interrogate the Monogenic Nephrotic  
457 Syndrome Diagnosis in a Case Cohort. *J Am Soc Nephrol* **27**, 1970-1983 (2016).
- 458 30. Richards, S., *et al.* Standards and guidelines for the interpretation of sequence variants: a  
459 joint consensus recommendation of the American College of Medical Genetics and  
460 Genomics and the Association for Molecular Pathology. *Genet Med* **17**, 405-424 (2015).
- 461 31. Beck, L.H., Jr., *et al.* M-type phospholipase A2 receptor as target antigen in idiopathic  
462 membranous nephropathy. *N Engl J Med* **361**, 11-21 (2009).
- 463 32. Hiraoka, Y., Sedat, J.W. & Agard, D.A. Determination of three-dimensional imaging  
464 properties of a light microscope system. Partial confocal behavior in epifluorescence  
465 microscopy. *Biophys J* **57**, 325-333 (1990).
- 466 33. Matsuda, A., Schermelleh, L., Hirano, Y., Haraguchi, T. & Hiraoka, Y. Accurate and  
467 fiducial-marker-free correction for three-dimensional chromatic shift in biological  
468 fluorescence microscopy. *Sci Rep* **8**, 7583 (2018).

469

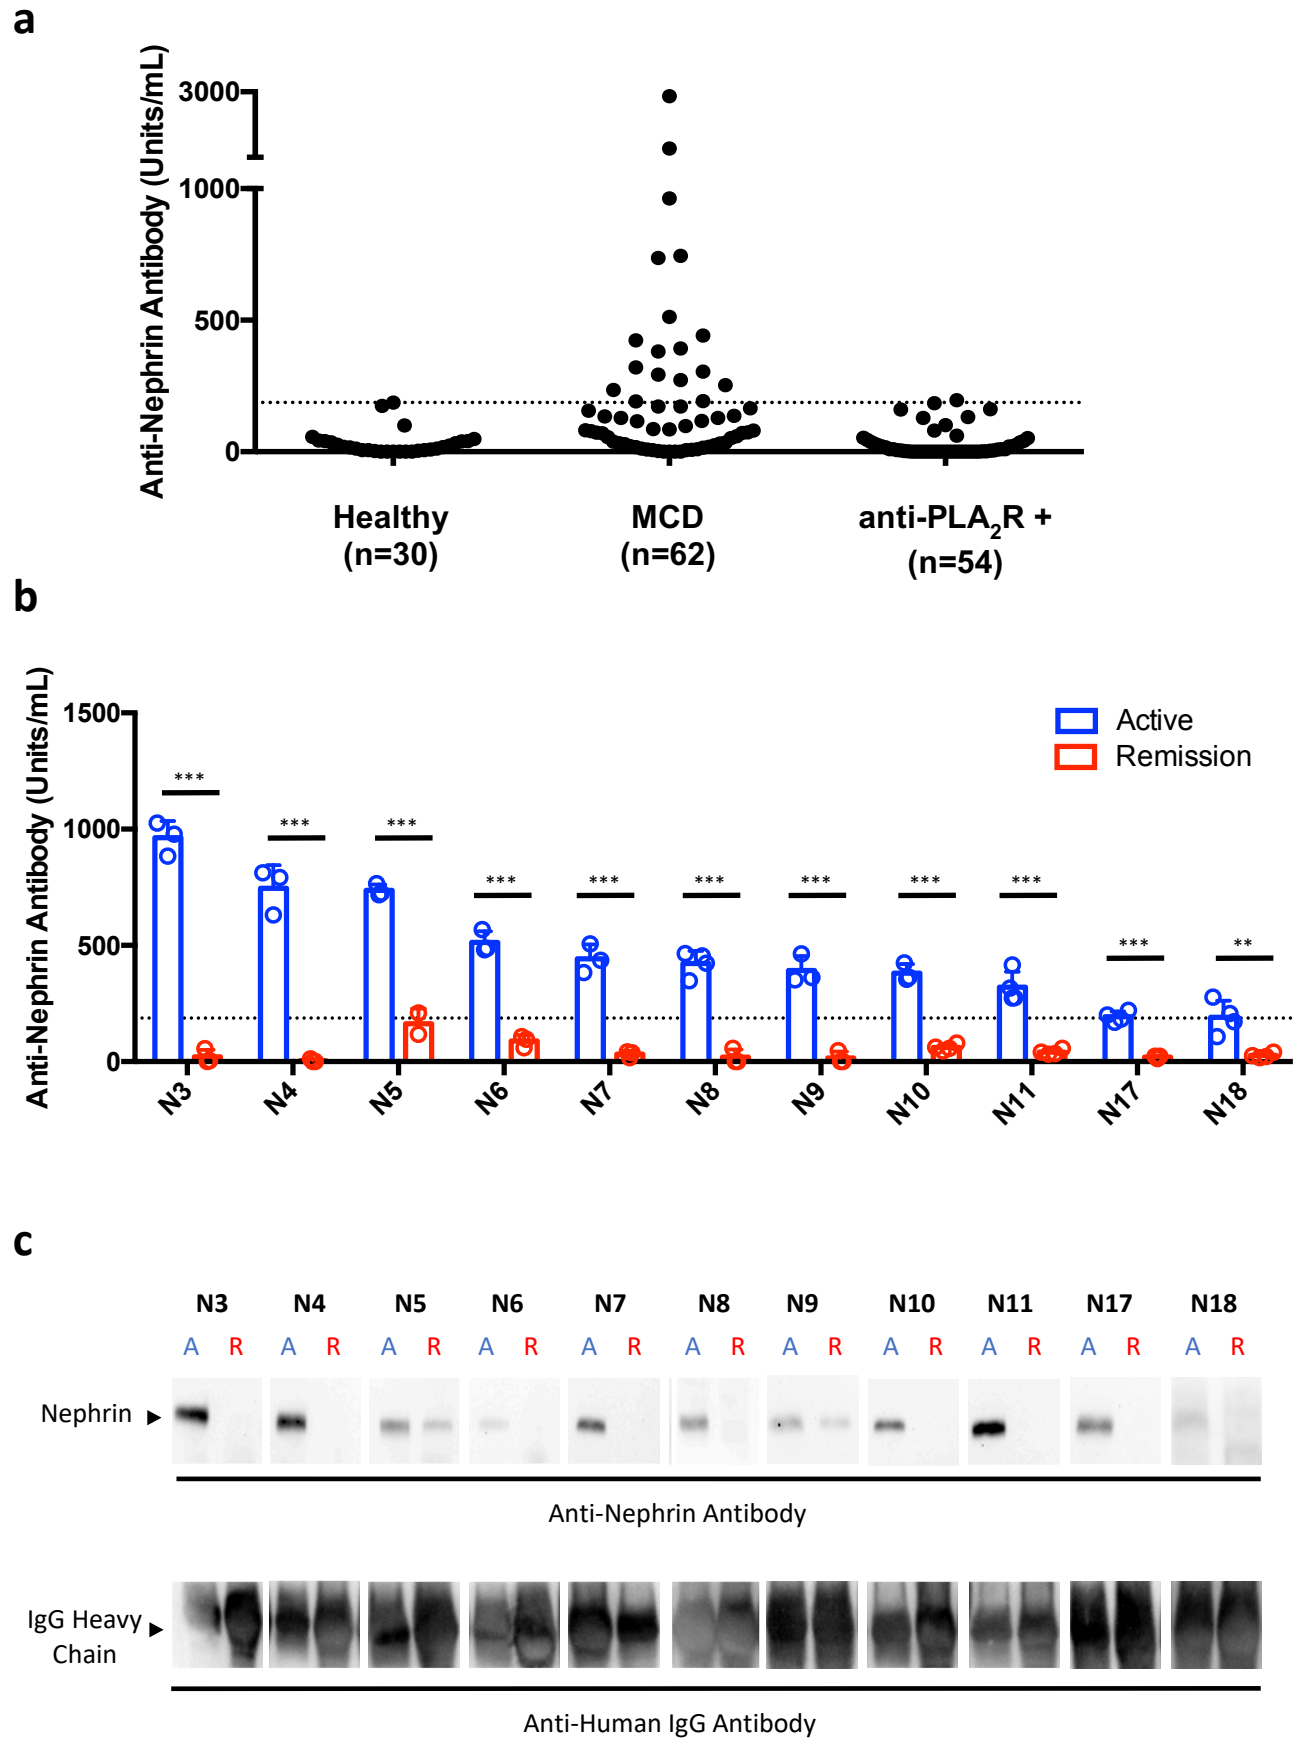

**Figure 1**

**Figure 1: Circulating autoantibodies against nephrin are present in a subset of MCD patients from the NEPTUNE study cohort and correlate with disease activity.**

**(a)** Antibodies against the extracellular domain of recombinant human nephrin (hNephrin<sub>G1059</sub>) were measured by indirect ELISA. Antigen specific binding was determined by subtracting the average OD<sub>450nm</sub> of duplicate uncoated wells (nonspecific background) from the average OD<sub>450nm</sub> of duplicate hNephrin<sub>G1059</sub> coated wells for each individual patient sample. A relative antibody titer was then determined from a standard curve that was generated using a single positive patient sample with a 1:100 dilution defined as containing 1000 Units/ml. The threshold for anti-nephrin antibody positivity (187 Units/ml) was defined as the maximum antibody titer, as the cohort was not normally distributed, in a healthy control population (n=30) with no known kidney disease (dotted line) to maximize specificity. The earliest serum sample available during active disease (urine protein creatinine ratio (UPCR) > 3 g/g on the day of sample collection) was positive for anti-nephrin antibodies in 18 (29%) of 62 patients with biopsy proven MCD from the NEPTUNE cohort. 53 (98%) of 54 nephrotic control patients with anti-human phospholipase A<sub>2</sub> receptor (hPLA<sub>2</sub>R+) antibodies, as determined by clinical ELISA and IIFT assays (Euroimmun), were negative for anti-nephrin antibodies. The intra and inter-assay coefficient of variances for the anti-nephrin antibody ELISA were 5.56% and 14.36% respectively. The antibody titer for the NEPTUNE patients and controls are given in Supplemental Table S1. **(b)** 11 of the 18 NEPTUNE patients who were anti-nephrin antibody positive during active disease (blue bar) had a subsequent serum sample available during complete remission (UPCR < 0.3 g/g on the day of sample collection) which tested anti-nephrin antibody negative (red bar) in all cases. Dotted line indicates threshold for positive antibody titer (187 Units/ml). Student t-test was used to compare differences between the active and remission samples \*\*p<0.01, \*\*\*p<0.001. **(c)** The same serum samples

evaluated by ELISA from the NEPTUNE cohort (b) were evaluated for their ability to immunoprecipitate nephrin from HGE (derived from non-diseased human kidney). In keeping with the ELISA results, only serum obtained during active disease (indicated by an arrow with an A (blue colored) above it) immunoprecipitated nephrin, whereas serum obtained during remission (indicated by an arrow with a R (red colored) above it) did not. Total IgG was comparable between active and remission samples for each patient.

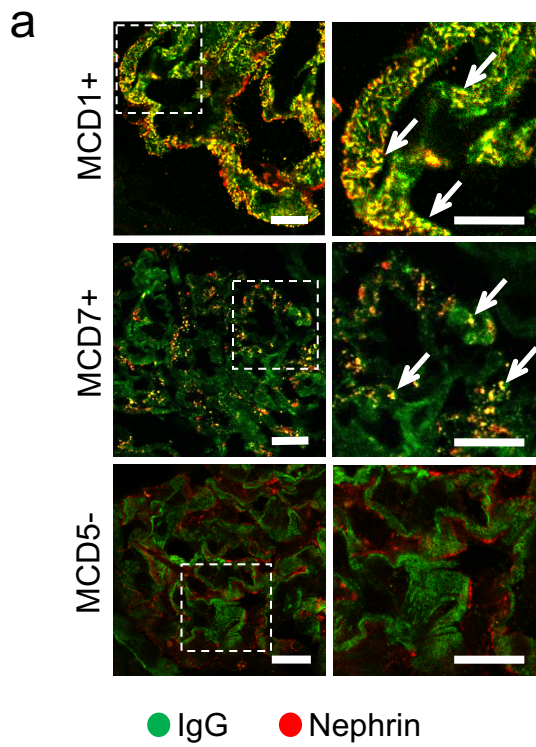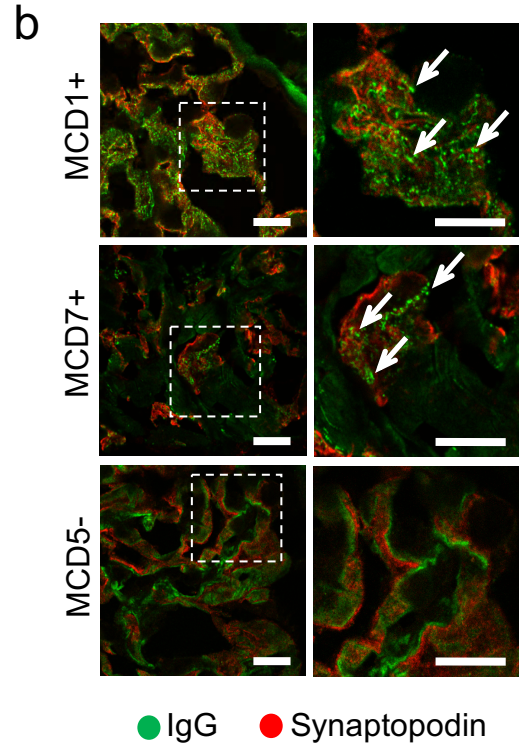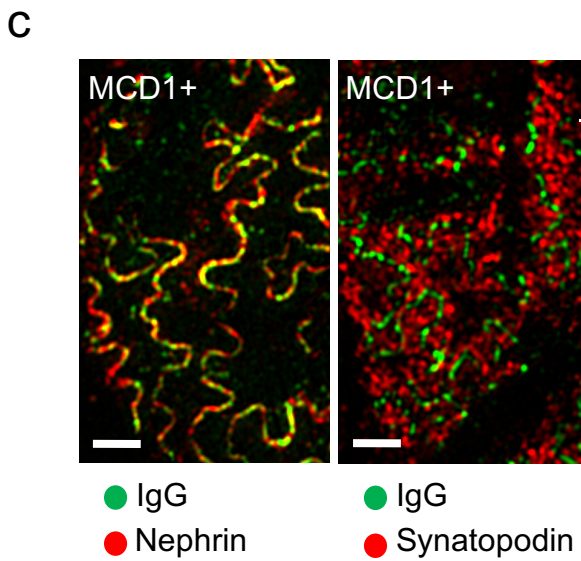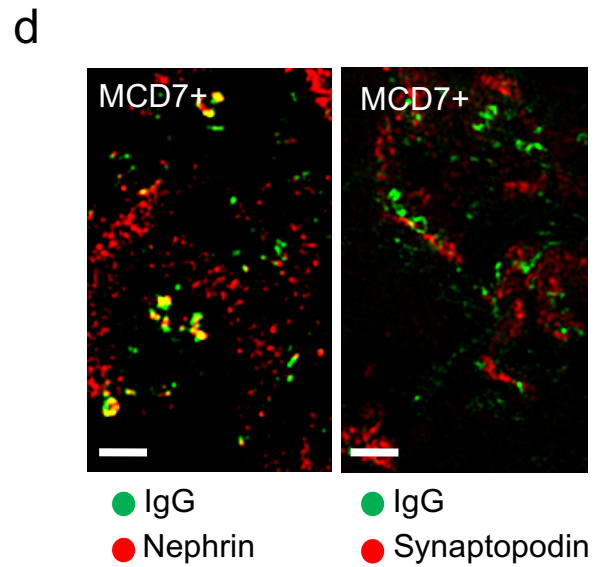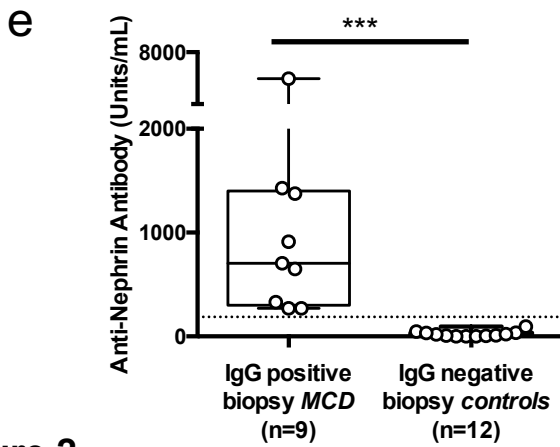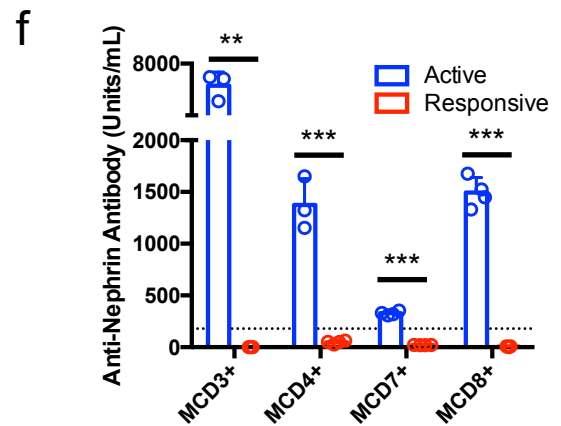

**Figure 2**

**Figure 2: Renal biopsy imaging studies and serological testing for anti-nephrin antibodies in patients with biopsy proven MCD**

**(a)** Representative confocal microscopy images of glomeruli in IgG-positive MCD (MCD1+/MCD7+) and IgG-negative MCD (MCD5-), stained for IgG (green) and the podocyte slit-diaphragm protein nephrin (red). There is a clear overlap (yellow) between IgG (green) and nephrin (red) specifically with the punctate IgG and not background as seen in the MCD+ biopsies (MCD1+/MCD7+) (white arrows) but not in MCD- biopsies. The right panels show magnified images of boxed areas of MCD1+ and MCD7+ biopsies. Scale bar: 10 $\mu$ m. **(b)** Representative confocal microscopy images of glomeruli in IgG-positive MCD (MCD1+/MCD7+) and IgG-negative MCD (MCD5-), stained for punctate IgG (green) (indicated with white arrow) and the cytoskeletal podocyte marker synaptopodin (red). There is no appreciable overlap between IgG and Synaptopodin in any of those cases. The right panels show magnified images of boxed areas of MCD1+ and MCD7+ biopsies. Scale bar: 10 $\mu$ m. **(c)** Super Resolution Structured Illumination Microscopy (SIM) images of 0.125  $\mu$ m individual Z-slices showing *en face* views of the podocyte junction from a representative renal biopsy (MCD1+) in which the nephrin remains GBM-associated, forming a curvilinear pattern. The left image shows co-localization (yellow) of IgG (green) with the slit diaphragm protein nephrin (red), in contrast to mutual exclusivity with the foot process associated synaptopodin (red) shown in the right image, indicating intimate spatial association with nephrin along the podocyte slit diaphragm. (Full image stack shown in Figure S8). Scale bar: 1  $\mu$ m. **(d)** SIM image of 0.125  $\mu$ m individual Z-slices from a representative renal biopsy (patient MCD7+) in which nephrin is redistributed to a more granular pattern. The left image shows co-localization (yellow) of IgG (green) with the slit diaphragm protein nephrin (red), in contrast to mutual exclusivity with the foot process associated synaptopodin (red) shown in the



right image, indicating a continued close spatial association of the IgG with the redistributed nephrin. (Full image stack shown in supplemental Figure S8). Scale bar: 1  $\mu$ m. **(e)** All of the patients with MCD and IgG deposition on biopsy (n=9) were anti-nephrin antibody positive, whereas all of the control subjects lacking IgG deposition on biopsy, consisting of DN (n=2), Amyloidosis (n=1), IgG-negative FSGS (n=2), IgG-negative TL (n=1), normal (n=1), disease-free region of tumor nephrectomy (n=2) and IgG-negative MCD (n=3), were anti-nephrin antibody negative (n=12). The Mann-Whitney U test was used to compare differences between the groups \*\*\*p<0.001. **(f)** Serum/plasma samples were obtained from patients with biopsy proven IgG-positive MCD (MCD+) during active disease (within 7 days of presentation with NS) and follow-up samples were obtained during complete (MCD4+, MCD7+) or partial (MCD8+) remission on the day of sample collection. For MCD3+, the follow-up serum sample was obtained approximately 3 weeks after entering a period of sustained complete remission. The threshold for a positive anti-nephrin antibody titer of 187 U/ml (indicated by dotted line) was based on the upper limit of a healthy control population. Anti-nephrin antibodies in serum/plasma were undetectable or significantly reduced to below the threshold for positivity, (red bar) during clinical remission compared with those during active disease (blue bar). Complete remission was defined as urinary protein creatinine ratio (UPCR) < 0.3 g/g or urinary albumin creatinine ratio (UACR) < 0.2 g/g. Partial remission was defined as a > 50% reduction in proteinuria (UPCR) that did not fall below 0.3 g/g. Student t-test was used to compare differences between the active and remission samples \*\*p<0.01, \*\*\*p<0.001.
